1 **Alteration of Gut Microbiome in Lung Cancer Patients**

2

3 **Li Ming,<sup>a</sup> Yu Fang,<sup>b</sup> Chen Xiaohui,<sup>b</sup> Zhou Huan,<sup>b</sup> Wei Xiaoqing,<sup>c</sup> Liu Yinhui,<sup>a</sup>**

4 **Liu Yuanyu,<sup>b</sup> Tang Li,<sup>a</sup> Yuan Jieli,<sup>a\*</sup> Wen Shu,<sup>a\*</sup> and Chen Jun<sup>b\*</sup>**

5

6 <sup>a</sup>College of Basic Medical Science, Dalian Medical University, Dalian, China.

7 <sup>b</sup>Department of Medical Oncology, the Second Affiliated Hospital of Dalian Medical  
8 University, Dalian,China;

9 <sup>c</sup>The Core Laboratory of Medical Molecular Biology of Liaoning Province, Dalian  
10 Medical University, Dalian, China.

11

12 \*Correspondence:

13 Prof. Wen Shu, Ph.D. Department of Microecology, College of Basic Medical Science,  
14 Dalian Medical University, No.9 Western Section of Lvshun South Street,  
15 Lvsgghunkou District, Dalian, Liaoning 116044, China. E-mail:  
16 [wsh2008cn@sina.com](mailto:wsh2008cn@sina.com)

17 Prof. Yuan Jieli, M.D. Department of Microecology, College of Basic Medical  
18 Science, Dalian Medical University, No.9 Western Section of Lvshun South Street,  
19 Lvshunkou District, Dalian, Liaoning 116044, China. E-mail: [zgwst@126.com](mailto:zgwst@126.com)

20 Prof. Chen Jun, Ph.D. Department of Medical Oncology, The Second Affiliated  
21 Hospital, Dalian Medical University, 467 Zhongshan Road, Shahekou District, Dalian,  
22 Liaoning 116023, China. E-mail: [chenjundl@vip.sina.com](mailto:chenjundl@vip.sina.com)



24 **ABSTRACT** Lung cancer is the leading cause of cancer death. Better  
25 understanding of factors and pathways involved in lung cancer is needed to improve  
26 diagnose and treatment strategies. Recent studies have provided insights into the  
27 possible correlation between intestinal dysbiosis and cancer development. Although  
28 the immunological relationship between gut and lung had been suggested by many  
29 researches, however, to date, no study had investigated the characterization of gut  
30 microbiome in treatment naïve lung cancer patients, whether it is distinct from that of  
31 health individuals and contribute to the onset and development of lung cancer remain  
32 unclear. In this study, we investigated whether gut microbiome of lung cancer patients  
33 (LC, n=28) is altered compare with that of matched healthy individuals (HC, n=19) by  
34 high throughout sequencing of the V3-V4 regions of 16S rDNA in their fecal samples.  
35 We also identified microbiota signatures specific for different histological types of  
36 lung cancer, including SSC, ADC, and SCLC. The gut microbiome of lung cancer  
37 patients is characterized by decreased relative abundance of *Prevotella*, and increased  
38 bacteria groups such as *Actinomyces*, and *Streptococcus*, etc. We also detected a mild  
39 structural shift in gut microbiome between ADC and SCLC patients. Our results  
40 showed that the gut microbiome of lung cancer patients altered significantly  
41 compared with healthy individuals. However, the association between microbial  
42 dysbiosis and lung cancer is not clearly understood, future studies involving larger  
43 cohorts and metagenomics, or metabolomics, may elucidate the correlations between  
44 gut microbiota and lung cancer development.

45 **IMPORTANCE** This is the first report to show the alteration of gut microbiome in

46 lung cancer patients. Our results showed that the gut microbiome of lung cancer  
47 patients altered significantly compared with healthy individuals.

48

49 **KEYWORDS:** lung cancer, gut microbiome, dysbiosis, *Prevotella*

50

## 51 INTRODUCTION

52 Lung cancer is the leading cause of cancer death (1). There are estimated 1.82 million  
53 new cases of lung cancer globally, which constitutes nearly 13% of all newly  
54 diagnosed cancer cases annually (2). More than one-third of lung cancer worldwide  
55 occurring in China, where 733,000 new cases of lung cancer are diagnosed, and about  
56 591,000 Chinese people died from it each year (3-4). Better understanding of factors  
57 and pathways involved in lung cancer is urgently needed to improve treatment  
58 strategies.

59 As a heterogeneous disease, many factors are involved in the onset and  
60 development of lung cancer. Although smoking is considered as an important factor,  
61 only 10–15% of smokers develop cancer (5), which highlights other influences, such  
62 as the involvement of microbial communities. Recent studies showed that changes in  
63 the lung microbiome may be relevant for progression and exacerbations in lung  
64 cancer (6,7). By comparison of microbiome in bronchoalveolar lavage fluid of  
65 patients with lung cancer with benign mass like lesions, Lee *et al.* found that the  
66 genera *Veillonella* and *Megasphaera* are more abundant in lung cancer patients,  
67 which may serve as potential biomarkers for the disease detection/classification (8). A  
68 recent research, in which surgical lung tissue samples were used, concluded that the  
69 microbiota of the lung cancer is unique, with the genus *Thermus* more abundant in  
70 tissue from advanced stage (IIIB, IV) patients, while *Legionella* is higher in patients  
71 who develop metastases (9). These studies provide insights into the possible  
72 correlation between microbiota and lung cancer development.

73           However, lung microbiota doesn't seem to be the only microbial factor  
74           contributing to the development of lung cancer. The influence of gut microbiota on  
75           lung immunity has been vastly explored and several studies have linked changes in  
76           the gut microbiome with lung diseases (10,11). For example, gut flora is responsible  
77           for inducing lung inflammatory reaction against bacterial challenge and enhancing  
78           neutrophils infiltration through TLR4 in mice (12,13). Antibiotic treatment can cause  
79           overgrowth of particular fungal species in the gut and promote allergic airway  
80           inflammation via fungi-induced prostaglandin E2 (14). Conversely, the lung  
81           microbiota also influences the gut microbiota through the blood stream. Acute lung  
82           injury (ALI) can disrupt the lung microbiota, induces a transient translocation of  
83           bacteria into blood and causes an acute increase of bacterial load in cecum (15). These  
84           studies emphasized the important role of gut-lung axis in development of diseases  
85           (16). However, to date, no study had investigated the characterization of gut  
86           microbiome in treatment naïve lung cancer patients, whether it is distinct from that of  
87           health individuals and contribute to the onset and development of lung cancer remain  
88           unclear.

89           In this study, we investigated whether gut microbiome of lung cancer patients  
90           (LC, n=28) is altered compare with that of matched healthy individuals (HC, n=19) by  
91           high throughout sequencing of the V3-V4 regions of 16S rDNA in their fecal samples.  
92           We also identified microbiota signatures specific for different histological types of  
93           lung cancer, including SSC, ADC, and SCLC.

## 94           **RESULTS**

95        **Characteristics of participants.** A total of 50 participants enrolled in the  
96 Department of Medical Oncology, The Second Affiliated Hospital of Dalian Medical  
97 University (Dalian, China). Participants were excluded after fecal sample collection  
98 because of antibiotic use, received chemotherapy, or combined with other diseases  
99 such as diabetes mellitus (Fig. 1). Finally, a total of 28 LC patients were remained,  
100 they were mainly males (83%) with a median age of 65 years old (Table 1) and with  
101 an average smoking index of  $606.79 \pm 127.1$ . 19 healthy controls (HC) were included  
102 for age and gender matching, with an average smoking index of  $350.00 \pm 72.1$  ( $P >$   
103  $0.05$  compared with LC group) (details in Table 1). More than 64% of the enrolled LC  
104 patients were smokers, with a high smoking index about  $606.79 \pm 127.1$ . Among them,  
105 28.57% (8/28) of the patients were diagnosed as SCLC, and 71.43% (20/28) were  
106 NSCLC. Among the NSCLC patients, 21.43% (6/28) were diagnosed as squamous  
107 cell carcinoma and 50.00% (14/28) were adenocarcinoma.

108        **The overall structure of gut microbiome in LC patients.** By sequencing of the  
109 16S ribosomal RNA gene, we found that The HC and LC groups share about 2368  
110 same Operational Taxonomic Units (OTUs), but there are 372 OTUs were obtained  
111 specifically in the HC group, and 202 were obtained specifically in the LC group (Fig.  
112 2A). We observed significant decrease in alpha diversity of gut microbiota in LC  
113 group, which expressed by the ACE and Chao1 index (Fig. 2B and C). Whereas the  
114 Shannon diversity index and the Simpson index did not show significant differences  
115 between two groups (Fig. S1). Changes in the relative abundance of gut microbes in  
116 LC patients were observed not only on the phylum level, but also on the levels of

117 order, class, and family (Fig. S4). At genus level, significant decreased abundance of  
118 *Prevotella* and elevated abundance of *Bacteroides*, and *Ruminococcus* etc. were  
119 detected in LC patients (Fig. 2D).

120 The beta diversity metrics from the control and LC individuals also showed  
121 strong grouping pattern. Although significant inter-individual variation exists among  
122 patients and the healthy controls, the fecal microbiota of the two groups still separated  
123 clearly according to community composition using Principal component analysis  
124 (PCA, Fig. S3), and unweighted/weighted UniFrac Principal coordinates analysis  
125 (PCoA) (Fig. 2E). These differences were also observed by the two-dimensional  
126 Nonmetric Multidimensional Scaling (NMDS) based on unweighted/weighted  
127 UniFrac (Fig. 2F). Most of the samples from each group clustered together as  
128 evaluated by Hierarchical clustering based on Weighted UniFrac by the method of  
129 Unweighted pair-group method with arithmetic means (UPGMA, Fig. S4). Especially,  
130 when analyzed by the method of Partial Least Squares Discriminant Analysis  
131 (PLSDA), we observed a significant separation between the LC patients and HCs (Fig.  
132 2G).

133 **Altered microbiota composition in LC patients.** The alteration of gut  
134 microbiome in LC patients was further proved by the LEfSe approach, which  
135 identified the key phylotypes responsible for the difference between the two groups.  
136 *Actinobacteria*, *Bacilli*, *Ruminococcus*, *Streptococcus*, and *Mycobacteriaceae*, etc,  
137 which were most abundant in the LC group, and *Prevotella*, *Bacteroidetes*, and  
138 *Dialister*, which were most abundant in the HCs, were the dominant phylotypes that



139 contributed to the difference between the intestinal microbiota of LC patients and HCs  
140 (Fig. 3A and B). The significantly elevated relative abundance of *Actinomyceae*,  
141 *Streptococcus*, and *Ruminococcus*, and decreased abundance of *Prevotellaceae* were  
142 observed in the gut microbiome of most of the LC patients, which suggested a highly  
143 consistence among different individuals (Fig. S5).

144 Using the method of Metastats, we found a significant decrease in the abundance  
145 of *Bacteroidetes* (phylum), *Bacteroidia* (class), *Bacteroidales* (order) and elevated  
146 abundance of *Firmicutes* (phylum), *Bacilli* (class), *Actinomycetales* (order), *Bacillales*  
147 (order), *Lactobacillales* (order) in gut of the LC patients (Fig. S6). On the family level,  
148 significant elevation of the relative abundance of *Streptococcaceae*, *Actinomycetaceae*,  
149 decreased abundance of the *Prevotellaceae* and *Veillomellaceae* were observed in gut  
150 of LC patients compared with HCs (Fig. 4A). These changes may mainly due to the  
151 changing of genus such as the *Streptococcus*, *Actinomyces*, and *Prevotella* etc (Fig.  
152 4B). In addition, we also detected elevation of genera such as *Ruminococcus*, *Rothia*,  
153 *Bacillus*, *Peptostreptococcus*, *Mycoacterium*, etc, and decreased abundance of  
154 *Dialister* in gut of LC patients, which are consistent with LEfSe analysis results.

#### 155 **Comparison of gut microbiome in LC patients with specific histological types.**

156 We further performed a detailed comparison of the gut microbiome in lung cancer  
157 patients according to different histological types, including adenocarcinoma (Group A,  
158 n=14), squamous cell carcinoma (Group B, n=6), and SCLC (Group C, n=8). Only the  
159 index of alpha diversity (ACE) in SCLC patients is significantly lower than control  
160 (Fig. 5A). Other groups showed no significant differences compared either with HC

161 or other groups, although the average indexes of each of the specific histological type  
162 are obviously lower than that of the HCs (Fig. 5A and Fig. S7). The beta diversity  
163 analysis by PCoA and NMDS showed no obvious separation between groups (Fig. 5B  
164 and C). When analyzed by the method of PLSDA, we observed a mild separation  
165 between group A and C, which suggested that the gut microbiome of SCLC patients  
166 may differ from that of LC patients with adenocarcinoma (Fig. 5D). The  
167 taxonomy-based comparison at the genus level showed that, *Bifidobacterium*,  
168 *Clostridium*, and *Prevotella*, etc, are the dominant phylotypes in group A, but were  
169 significantly reduced in the other two groups. In group B, the dominant genera  
170 including *Ruminococcus*, *Lachnospira*, and *Lactobacillus*, etc, which are less  
171 abundant in group A and C. in addition, the genera of *Streptococcus*, *Anaerotruncus*,  
172 and *Bacillus*, etc are more abundant in group C when compared with group A and B  
173 (Fig. S8).

174

## 175 **DISCUSSION**

176 Alterations of the gut microbiome influence the incidence and progression of not  
177 only gastric carcinogenesis (17), but also extra-intestinal cancers, such as breast and  
178 hepatocellular carcinoma, presumably through inflammatory and metabolic circuitries  
179 (18). Meanwhile, gut microbiota was also found contribute to the acute lung injury  
180 (19), the exacerbation of chronic obstructive pulmonary disease (COPD) (20), and the  
181 development of asthma (21), which highlighted its important role in affecting the  
182 respiratory system. Actually the hypothesis of “gut – lung” axis has been raised 20

183 years ago, when study found that gut-derived injurious factors can reach to the lung  
184 and systemic circulation via the intestinal lymphatics (22). Gut flora was found to be  
185 responsible for inducing lung inflammation against bacteria in mice and enhancing  
186 neutrophils infiltration through activation of toll like receptor 4 (TLR4) (23). Such  
187 immune transmission from gut to lung has been proved by many studies. One  
188 viewpoint supports that exacerbation of chronic lung diseases occur as an  
189 uncontrolled and inappropriate inflammatory response to bacteria colonizing damaged  
190 airways due to an ineffective Peyer's patch-derived T lymphocyte response (24).  
191 These studies above strongly suggested a possible correlation between intestinal  
192 dysbiosis and the development of lung cancer. However, to our knowledge, no study  
193 has explored this possibility yet.

194 Although based on a small number of cases, we found a statistically significant  
195 decrease of alpha diversity in gut microbiota of lung cancer patients, compared with  
196 that of the healthy controls, which was consist with previous discovery that  
197 non-malignant lung tissues have higher microbiota alpha diversity than the paired  
198 tumors (10). The decline in both the bacterial diversity and richness was found in gut  
199 of patients with chronic inflammation such as inflammatory bowel disease (IBD) and  
200 colonrectal cancer, especially in patients with conventional adenoma (25). Reduced  
201 respiratory microbiome was also shown associated with greater emphysema and  
202 increased immune cell infiltration in COPD patients (26). These observations seem in  
203 line with the hygiene hypothesis that diverse microbes play an essential role in  
204 establishing the immune networks of a host, while in patients with various

205 non-communicable inflammatory diseases, such as asthma, these regulatory networks  
206 seemed to be underrepresented and poorly developed (27).

207 Alterations of the gut microbial structure in lung cancer patients were  
208 characterized by the significant decrease of *Bacteroidetes* (phylum), *Bacteroidia*  
209 (Class), *Bacteroidales* (Order), and increase of *Firmicutes* (phylum), *Bacilli* (Class),  
210 *Actinomycetales*, and *Bacillales* (Order), which were mainly contributed by the  
211 reduction of bacteria genera such as *Prevotella* and *Dialister*, and the increase in  
212 *Ruminococcus*, *Streptococcus*, *Rothia*, *Bacillus*, *Actinomyces*, *Peptostreptococcus*, etc.  
213 These changes are not consistent with previous studies in saliva, bronchoalveolar  
214 lavage fluid, or lung tissues in patients with lung cancer, except that the genus of  
215 *Streptococcus* was previously found increased in lower airway of LC patients (28).  
216 But interestingly, they are highly agreed with the observations in patients with colon  
217 cancer that the class of *Bacilli*, genera of *Streptococcus*, *Actinomyces*,  
218 *Peptostreptococcus*, and etc are enriched (29). Importantly, we found a significantly  
219 increased ratio of *Bacteroides/Prevotella*, which was also proved in patients with  
220 colorectal cancer when compared with normal individuals (25). Taken together, these  
221 results indicate a state of dysbiosis in the gut microbiome of patients with lung cancer.

222 As the major genus that was found significantly reduced in LC patients' gut,  
223 *Prevotella* had drawn many of our attentions. *Prevotella* strains are classically  
224 considered commensal bacteria due to the extensive presence in the healthy human  
225 body and the rare involvement in infections. *Prevotella* can stimulate epithelial cells  
226 to produce cytokines such as IL-8, IL-6 and CCL20, which can promote mucosal

227 Th17 immune responses and neutrophil recruitment (30). Increased *Prevotella*  
228 abundance is associated with augmented Th17-mediated mucosal inflammation,  
229 which is in line with the marked capacity of *Prevotella* in driving Th17 immune  
230 responses through activation of TLR2 (30). These studies suggested an  
231 immune-stimulating activity of this genus. Congruously, *Prevotella* abundance was  
232 found reduced within the lung microbiota of patients with asthma and COPD (31),  
233 which further highlighted its important role in affecting lung cancer development.

234 On the other side, the increasing of certain bacteria in LC patients suggested a  
235 deleterious role of them in the development of cancer. Species of *Streptococcus* are  
236 found to increase in patients with LC. Compared to healthy controls,  
237 the NSCLC patients presented significantly higher frequencies of Th1 and Th17  
238 cells reacting to *S. salivarius* and *S. agalactiae*, in the PB, LC, and GI tract (32). The  
239 order of *Actinomycetales* had been as potential colorectal cancer driver bacteria (25).  
240 Among them, the filamentous Gram-positive anaerobic genus *Actinomyces*, was  
241 found to cause *Actinomycosis*, which is a rare and slowly progressive infectious  
242 disease that can affect a variety of organ systems including the lung (33). *Actinomyces*  
243 was also found significantly associated with the carcinoma-in-adenoma group (34).  
244 Besides, *Peptostreptococcus* species, *P. stomatis* was confirming known to be  
245 associated with CRC (35). *P. anaerobius*, which is increased in human colon tumors  
246 compared with nontumor tissues, can enhance AOM-induced tumorigenesis in mice  
247 by activating TLR2/4-ROS-cholesterol axis (36). In addition, species of *Atopobium*,  
248 *A. parvulum* was found positively correlates with pediatric IBD disease severity (37).

249 However, the effects of these bacteria on lung cancer development are still unclear,  
250 which deserves in-deep study.

251 In addition, we compared the gut microbiome of lung cancer patients according  
252 to different histological types based on collected samples, including SSC, ADC, and  
253 SCLC. Although the alpha diversity among groups showed no difference, we detected  
254 an obvious separation of beta diversity between patients with ADC and SCLC. Given  
255 the limited number of study cases, further large scale studies on the characterization  
256 of gut microbiome in LC patients with different histological types are necessary.

257 **Conclusions.** In conclusion, this is the first report to show the alteration of gut  
258 microbiome in lung cancer patients. Our results showed that the gut microbiome of  
259 lung cancer patients altered significantly compared with healthy individuals. However,  
260 the association between microbial dysbiosis and lung cancer is not clearly understood,  
261 future studies involving larger cohorts and metagenomics, or metabolomics, may  
262 elucidate the correlations between gut microbiota and lung cancer development.

263

## 264 **MATERIALS AND METHODS**

265 **Study subjects and sample collection.** The recruitment of participants and the  
266 process of sample collection are depicted in Fig. 1. Fifty patients (age, 50 – 75 years)  
267 were ultimately recruited from the Second Affiliated Hospital of Dalian Medical  
268 University, Dalian, China, from September 2015 to July 2016. Fecal samples were  
269 collected in Stool Collection Tubes, which were pre-filled with Stool DNA Stabilizer  
270 for collection (Stratec, Germany), then frozen and stored at -80 °C for further use. All

271 subjects were examined clinically before sampling and were subsequently divided  
272 into three groups: SCLC (n=17), AC (n=18), SCC (n=15). The samples of the healthy  
273 controls (HC, n = 30) were collected during routine physical examination at the First  
274 Affiliated Hospital of Dalian Medical University, Dalian, China.

275 The participants with the following diseases were excluded: cardiovascular  
276 disease, diabetes mellitus, liver cirrhosis, irritable bowel syndrome, inflammatory  
277 bowel disease, infections with known active bacteria, fungi, or virus. Those who  
278 abused drug or alcohol in the last year, or used antibiotics, probiotics, prebiotics, or  
279 synbiotics in the month, or received chemotherapy before collection of the fecal  
280 sample were also excluded.

281 **DNA extraction, polymerase chain reaction (PCR) and pyrosequencing.** The  
282 microbial genome was extracted using E.Z.N.A. ® Stool DNA kit (Omega Bio-tek,  
283 Inc.) according to the manufacturer's instructions. A Nanodrop 2000  
284 Spectrophotometer was used to evaluate the purity and concentration of isolated DNA.  
285 The polymerase chain reaction (PCR) to amplify the V3-V4 region of bacterial 16S  
286 ribosomal RNA gene was performed as described previously. After amplicons  
287 extraction, samples were purified using AXYGEN gel extraction kit (Qiagen) and  
288 quantified by Quant-iT PicoGreen dsDNA Assay Kit on Microplate reader (BioTek,  
289 FLx800). Sequencing and data analysis were subsequently performed on an Illumina  
290 MiSeq platform by Personal Biotechnology Co., Ltd. (Shanghai, China). The taxa  
291 classification and statistical analysis were conducted as described in previous studies.

292 **Statistics and analysis.** Illumina MiSeq sequences obtained after quality control

293 analysis were used in the present analysis, which were uploaded to QIIME  
294 (Quantitative Insights Into Microbial Ecology, v1.8.0) for further study. The  
295 operational taxonomy units (OTUs) of representative sequences at a similarity cutoff  
296 of 97% and their relative abundance ( $\alpha$ -diversity) were used to calculate ACE and  
297 Chao1 index by UCLUST. The abundance and diversity of the OTUs ( $\beta$ -diversity)  
298 were examined using principal component analysis (PCA), Principal coordinates  
299 analysis (PCoA) and nonmetric multidimensional scaling (NMDS) with weighted and  
300 unweighted UniFrac analysis in R software. The statistical significance of the  
301 separation among groups was assessed by the linear discriminant analysis effect size  
302 (LEfSe) method based on linear discriminant analysis scores exploited by Curtis  
303 Huttenhower (<http://huttenhower.sph.harvard.edu/galaxy/>), which used the  
304 nonparametric factorial Kruskal–Wallis and Wilcoxon rank sum test to identify key  
305 OTUs for separating different treatment groups at a significance level of 0.05.  
306 Metastats analysis was performed based on the raw count data matrix to find out the  
307 taxa statistically different between HC and LC samples.

308 For the analyses of clinical data, the non-parametric *t*-test between HC and LC  
309 groups was performed with the assistance of GraphPad Prism 6 (Graph Pad Software,  
310 La Jolla, CA, USA). Results were considered to be statistically significant with  $P <$   
311 0.05. The taxa classification and statistical analysis were conducted as described in  
312 previous studies (38).

313 **Ethics statement.** This study protocol was approved by the Ethics Committee of  
314 the Second Affiliated Hospital of Dalian Medical University, Dalian, China. After



315 receiving a written description of the aim of this study, all participants gave written

316 informed consent prior to enrollment.

317

318

319 **SUPPLEMENTARY MATERIAL**

320 **Supplementary Figure legends**

321 **FIG S1**, Comparison of the Shannon (**A**) and Simpson (**B**) index of gut microbiome  
322 in HC and LC groups.

323 **FIG S2**, The gut bacterial composition in different groups at Phylum, Class, Order,  
324 and Family levels.

325 **FIG S3**, Principal component analysis of gut microbiome in HC and LC groups. PC1  
326 and PC2 account for 73.08% of the variation.

327 **FIG S4**, Hierarchical clustering based on Weighted UniFrac by the method of  
328 UPGMA. Number of samples: HC, 2-20, LC, 62-98

329 **FIG S5**, The relative abundance of the most differentially abundant bacterial taxa  
330 identified by LEfSe in each samples of different among groups.

331 **FIG S6**, The specific bacterial Phyla, Classes, and Orders that are significantly  
332 changed in LC patients compared with HCs detected by the MetaStat method.

333 **FIG S7**, Alpha diversity of gut microbiota in LC patients with specific histological  
334 types. (**A**) Venn diagram of shared and independent bacterial OTUs in different  
335 groups. (**B**) ACE, (**C**) Chao1, (**D**) Shannon, (**E**) Simpson.

336 **FIG S8**, The taxonomy-based comparison among groups at the genus level showed  
337 by heat map.

338

339 **ACKNOWLEDGMENTS**

340 This study was supported by the National Natural Science Foundation of China

341 (NSFC, 81370113), the Nature Science Foundation of Liaoning Province, China  
342 (2015020262), and the Research Foundation from the Department of Education,  
343 Liaoning Province, China (L2016003). This work was supported by Liaoning  
344 Provincial Program for Top Discipline of Basic Medical Sciences.

345

## 346 **CONFLICTS OF INTERSTS**

347 The authors declare no competing interest.

348

349

350

351

352 **REFERENCES**

- 353 1. Herbst RS, Heymach JV, Lippman SM. 2008. Lung cancer. *N Engl J Med*  
354 359(13): 1367-1380.
- 355 2. Siegel RL, Miller KD, Jemal A. Cancer statistics, 2016. 2016. *CA Cancer J*  
356 *Clin* 66(1): 7-30.
- 357 3. Youlden DR, Cramb SM, Baade PD. 2008. The international epidemiology of  
358 lung cancer: geographical distribution and secular trends. *J Thorac Oncol* 3(8):  
359 819-831.
- 360 4. Wang P, Zou J, Wu J, Zhang C, Ma C, Yu J, Yu J, Zhou Y, Li B, Wang K. 2017.  
361 Clinical profiles and trend analysis of newly diagnosed lung cancer in a  
362 tertiary care hospital of East China during 2011-2015. *J Thorac Dis* 9(7):  
363 1973-1979.
- 364 5. Wang X, Pittman GS, Bandele OJ, Bischof JJ, Liu G, Brothers JF 2nd, Spira A,  
365 Bell DA. 2017. Linking polymorphic p53 response elements with gene  
366 expression in airway epithelial cells of smokers and cancer risk. *Hum Genet*  
367 133(12): 1467-1476.
- 368 6. Man WH, de Steenhuijsen Piters WA, Bogaert D. 2017. The microbiota of the  
369 respiratory tract: gatekeeper to respiratory health. *Nat Rev Microbiol* 15(5):  
370 259-270.
- 371 7. Roudi R, Mohammadi SR, Roudbary M, Mohsenzadegan M. 2017. Lung  
372 cancer and beta-glucans: review of potential therapeutic applications. *Invest*  
373 *New Drugs* 35(4): 509-517.

- 374 8. Lee SH, Sung JY, Yong D, Chun J, Kim SY, Song JH, Chung KS, Kim EY,  
375 Jung JY, Kang YA, Kim YS, Kim SK, Chang J, Park MS. 2016.  
376 Characterization of microbiome in bronchoalveolar lavage fluid of patients  
377 with lung cancer comparing with benign mass like lesions. *Lung Cancer* 102:  
378 89-95.
- 379 9. Yu G, Gail MH, Consonni D, Carugno M, Humphrys M, Pesatori AC,  
380 Caporaso NE, Goedert JJ, Ravel J, Landi MT. 2016. Characterizing human  
381 lung tissue microbiota and its relationship to epidemiological and clinical  
382 features. *Genome Biol* 17(1): 163.
- 383 10. Chen MM, Zahs A, Brown MM, Ramirez L, Turner JR, Choudhry MA,  
384 Kovacs EJ. 2014. An alteration of the gut-liver axis drives pulmonary  
385 inflammation after intoxication and burn injury in mice. *Am J Physiol*  
386 *Gastrointest Liver Physiol* 307(7): G711-718.
- 387 11. Trompette A, Gollwitzer ES, Yadava K, Sichelstiel AK, Sprenger N,  
388 Ngom-Bru C, Blanchard C, Junt T, Nicod LP, Harris NL, Marsland BJ. 2014.  
389 Gut microbiota metabolism of dietary fiber influences allergic airway disease  
390 and hematopoiesis. *Nat Med* 20(2): 159-166.
- 391 12. Zou Y, Dong C, Yuan M, Gao G, Wang S, Liu X, Han H, Li B. 2014. Instilled  
392 air promotes lipopolysaccharide-induced acute lung injury. *Exp Ther Med* 7(4):  
393 816-820.
- 394 13. Ben DF, Yu XY, Ji GY, Zheng DY, Lv KY, Ma B, Xia ZF. 2012. TLR4  
395 mediates lung injury and inflammation in intestinal ischemia-reperfusion. *J*

- 396 Surg Res 174(2): 326-333.
- 397 14. Kim YG, Udayanga KG, Totsuka N, Weinberg JB, Núñez G, Shibuya A. 2014.  
398 Gut dysbiosis promotes M2 macrophage polarization and allergic airway  
399 inflammation via fungi-induced PGE(2). *Cell Host Microbe* 15(1): 95-102.
- 400 15. Sze MA, Tsuruta M, Yang SW, Oh Y, Man SF, Hogg JC, Sin DD. 2014.  
401 Changes in the bacterial microbiota in gut, blood, and lungs following acute  
402 LPS instillation into mice lungs. *PLoS One* 9(10): e111228.
- 403 16. He Y, Wen Q, Yao F, Xu D, Huang Y, Wang J. 2017. Gut-lung axis: The  
404 microbial contributions and clinical implications. *Crit Rev Microbiol* 43(1):  
405 81-95.
- 406 17. Huang X, Li C, Li F, Zhao J, Wan X, Wang K. 2018. Cervicovaginal  
407 microbiota composition correlates with the acquisition of high-risk human  
408 papillomavirus types. *Int J Cancer* 143(3):621-634.
- 409 18. Coker OO, Dai Z, Nie Y, Zhao G, Cao L, Nakatsu G, Wu WK, Wong SH,  
410 Chen Z, Sung JJY, Yu J. 2017. Mucosal microbiome dysbiosis in gastric  
411 carcinogenesis. *Gut* 67(6):1024-1032.
- 412 19. Mima K, Nakagawa S, Sawayama H, Ishimoto T, Imai K, Iwatsuki M,  
413 Hashimoto D, Baba Y, Yamashita YI, Yoshida N, Chikamoto A, Baba H. 2017.  
414 The microbiome and hepatobiliary-pancreatic cancers. *Cancer Lett* 402: 9-15.
- 415 20. Nicod LP, Kolls JK. 2015. Chair's summary: mechanisms of exacerbation of  
416 lung diseases. *Ann Am Thorac Soc* 12 Suppl 2: S112-114.
- 417 21. Ottiger M, Nickler M, Steuer C, Bernasconi L, Huber A, Christ-Crain M,

- 418 Henzen C, Hoess C, Thomann R, Zimmerli W, Mueller B, Schuetz P. 2017.  
419 Gut, microbiota-dependent trimethylamine-N-oxide is associated with  
420 long-term all-cause mortality in patients with exacerbated chronic obstructive  
421 pulmonary disease. *Nutrition* 45:135-141.e1.
- 422 22. Kang YB, Cai Y, Zhang H. 2017. Gut microbiota and allergy/asthma: From  
423 pathogenesis to new therapeutic strategies. *Allergol Immunopathol (Madr)*  
424 45(3): 305-309.
- 425 23. Magnotti LJ, Upperman JS, Xu DZ, Lu Q, Deitch EA. 1998. Gut-derived  
426 mesenteric lymph but not portal blood increases endothelial cell permeability  
427 and promotes lung injury after hemorrhagic shock. *Ann Surg* 228(4): 518-527.
- 428 24. Tsay TB, Yang MC, Chen PH, Hsu CM, Chen LW. 2011. Gut flora enhance  
429 bacterial clearance in lung through toll-like receptors 4. *J Biomed Sci* 18: 68.
- 430 25. Samuelson DR, Welsh DA, Shellito JE. 2015. Regulation of lung immunity  
431 and host defense by the intestinal microbiota. *Front Microbiol* 6: 1085.
- 432 26. Peters BA, Dominianni C, Shapiro JA, Church TR, Wu J, Miller G, Yuen E,  
433 Freiman H, Lustbader I, Salik J, Friedlander C, Hayes RB, Ahn J. 2016. The  
434 gut microbiota in conventional and serrated precursors of colorectal cancer.  
435 *Microbiome* 4(1): 69.
- 436 27. Richmond BW, Brucker RM, Han W, Du RH, Zhang Y, Cheng DS, Gleaves L,  
437 Abdolrasulnia R, Polosukhina D, Clark PE, Bordenstein SR, Blackwell TS,  
438 Polosukhin VV. 2016. Airway bacteria drive a progressive COPD-like  
439 phenotype in mice with polymeric immunoglobulin receptor deficiency. *Nat*

- 440 Commun 7: 11240.
- 441 28. Smits HH, Hiemstra PS, Prazeres da Costa C, Ege M, Edwards M, Garn H,  
442 Howarth PH, Jartti T, de Jong EC, Maizels RM, Marsland BJ, McSorley HJ,  
443 Müller A, Pfefferle PI, Savelkoul H, Schwarze J, Unger WW, von Mutius E,  
444 Yazdanbakhsh M, Taube C. 2016. Microbes and asthma: Opportunities for  
445 intervention. *J Allergy Clin Immunol* 137(3): 690-697.
- 446 29. Liu HX, Tao LL, Zhang J, Zhu YG, Zheng Y, Liu D, Zhou M, Ke H, Shi MM,  
447 Qu JM. 2018. Difference of lower airway microbiome in bilateral protected  
448 specimen brush between lung cancer patients with unilateral lobar masses and  
449 control subjects. *Int J Cancer* 142(4):769-778.
- 450 30. Sobhani I, Tap J, Roudot-Thoraval F, Roperch JP, Letulle S, Langella P,  
451 Corthier G, Tran Van Nhieu J, Furet JP. 2011. Microbial dysbiosis in colorectal  
452 cancer (CRC) patients. *PLoS One* 6(1): e16393.
- 453 31. Larsen JM. 2017. The immune response to *Prevotella* bacteria in chronic  
454 inflammatory disease. *Immunology* 151(4): 363-374.
- 455 32. Hilty M, Burke C, Pedro H, Cardenas P, Bush A, Bossley C, Davies J, Ervine  
456 A, Poulter L, Pachter L, Moffatt MF, Cookson WO. 2010. Disordered  
457 microbial communities in asthmatic airways. *PLoS One* 5(1): e8578.
- 458 33. Ma QY, Huang DY, Zhang HJ, Wang S, Chen XF. 2017. Upregulation of  
459 bacterial-specific Th1 and Th17 responses that are enriched in CXCR5 (+)  
460 CD4 (+) T cells in non-small cell lung cancer. *Int Immunopharmacol* 52:  
461 305-309.



- 462 34. Laguna S, Lopez I, Zabaleta J, Aguinagalde B. 2017. Actinofmycosis  
463 associated with foreign body simulating lung cancer. Arch Bronconeumol  
464 53(5): 284-285.
- 465 35. Kasai C, Sugimoto K, Moritani I, Tanaka J, Oya Y, Inoue H, Tameda M,  
466 Shiraki K, Ito M, Takei Y, Takase K. 2016. Comparison of human gut  
467 microbiota in control subjects and patients with colorectal carcinoma in  
468 adenoma: Terminal restriction fragment length polymorphism and  
469 next-generation sequencing analyses. Oncol Rep 35(1): 325-333.
- 470 36. Yu J, Feng Q, Wong SH, Zhang D, Liang QY, Qin Y, Tang L, Zhao H,  
471 Stenvang J, Li Y, Wang X, Xu X, Chen N, Wu WK, Al-Aama J, Nielsen HJ,  
472 Kiilerich P, Jensen BA, Yau TO, Lan Z, Jia H, Li J, Xiao L, Lam TY, Ng SC,  
473 Cheng AS, Wong VW, Chan FK, Xu X, Yang H, Madsen L, Datz C, Tilg H,  
474 Wang J, Brüner N, Kristiansen K, Arumugam M, Sung JJ, Wang J. 2017.  
475 Metagenomic analysis of faecal microbiome as a tool towards targeted  
476 non-invasive biomarkers for colorectal cancer. Gut 66(1): 70-78.
- 477 37. Tsoi H, Chu ESH, Zhang X, Sheng J, Nakatsu G, Ng SC, Chan AWH, Chan  
478 FKL, Sung JJY, Yu J. 2017. Peptostreptococcus anaerobius induces  
479 intracellular cholesterol biosynthesis in colon cells to induce proliferation and  
480 causes dysplasia in mice. Gastroenterology 152(6): 1419-33 e5.
- 481 38. Mottawea W, Chiang CK, Mühlbauer M, Starr AE, Butcher J, Abujamel T,  
482 Deeke SA, Brandel A, Zhou H, Shokralla S, Hajibabaei M, Singleton R,  
483 Benchimol EI, Jobin C, Mack DR, Figeys D, Stintzi A. 2016. Altered

484 intestinal microbiota-host mitochondria crosstalk in new onset Crohn's disease.

485 Nat Commun 7: 13419.

486

487

488

**TABLE 1** Characteristics of the study population

| <b>Variables</b>             | <b>Healthy controls</b> | <b>Patients with lung cancer</b>                                                                                                                                                                                                                                                                                                       | <b><i>p</i>-value</b> |
|------------------------------|-------------------------|----------------------------------------------------------------------------------------------------------------------------------------------------------------------------------------------------------------------------------------------------------------------------------------------------------------------------------------|-----------------------|
| <b>Sample size</b>           | n=19                    | n=28                                                                                                                                                                                                                                                                                                                                   |                       |
| <b>Age</b>                   | 57.21 ± 1.706           | 61.50 ± 1.345                                                                                                                                                                                                                                                                                                                          | 0.0525                |
| <b>Gender (F/M)</b>          | 3/19                    | 6/28                                                                                                                                                                                                                                                                                                                                   | 0.6385                |
| <b>BMI(kg/m<sup>2</sup>)</b> | 24.57 ± 1.427           | 25.95 ± 1.025                                                                                                                                                                                                                                                                                                                          | 0.0831                |
| <b>Smoking index</b>         | 350.00 ± 72.1           | 606.79 ± 127.1                                                                                                                                                                                                                                                                                                                         | 0.0845                |
| <b>Final diagnosis</b>       |                         | <p><b>SCLC 8 (28.57%)</b><br/>                     Extensive/limited stage 5/3</p> <p><b>NSCLC 20 (71.43%)</b><br/>                     Squamous cell carcinoma 6 (21.43%)<br/>                     Stage IIA/IIB/IIIA/IIIB/IV 1/1/1/1/2</p> <p>Adenocarcinoma 14 (50.00%)<br/>                     Stage IIA/IIIA/IIIB/IV 2/2/1/9</p> |                       |

489

490 **FIGURE LEGEND**

491 **FIG 1** The recruitment of participants and the process of sample collection.

492 **FIG 2** The intestinal bacterial composition in HCs and LC patients. **(A)** Venn diagram  
493 of shared and independent bacterial OTUs in HC and LC groups. **(B)** Comparison of  
494 the ACE and Chao1 index of HC and LC groups. **(C)** The bacterial composition in  
495 different groups at Genus level. **(D)** Principal Coordinate Analysis (PCoA) based on  
496 weighted Unifrac distances among different samples. **(E)** NMDS based on weighted  
497 Unifrac distances among different samples. **(F)** PLS-DA of the gut microbiome in HC  
498 and LC patients.

499 **FIG 3** LEfSe analysis of gut microbiota in HC and LC groups. **(A)** LEfSe identified  
500 the most differentially abundant bacterial taxons among groups. Group-specific  
501 enriched taxa are indicated with a positive LDA score bar with different colors. Only  
502 taxa meeting an LDA significant threshold  $>2$  are shown. **(B)** Taxonomic cladogram  
503 obtained from LEfSe analysis of 16S rDNA sequences. The brightness of each dot is  
504 proportional to its effect size.

505 **FIG 4** The specific bacterial groups that are significantly changed in LC patients  
506 compared with HCs detected by the MetaStat method. **(A)** Families, **(B)** Genera.

507 **FIG 5** Comparison of gut microbiome in LC patients with specific histological types.  
508 **(A)** Comparison of the ACE index of different groups. **(B)** PCoA based on  
509 unweighted and weighted Unifrac distances among different samples. **(C)** NMDS  
510 based on unweighted and weighted Unifrac distances among different samples. **(D)**  
511 PLS-DA of the gut microbiome in LC patients with specific histological types.

Healthy controls (HC, n=30)

Recruited patients (LC, n=50)

SCLC (n=17)

NSCLC (n=33)

AC (n=18)

SCC (n=15)

Excluded (n=11)  
for age matching

Excluded (n=9)  
Antibiotic use: 5  
Other diseases: 4

Excluded (n=4)  
Chemotherapy: 1  
Other diseases: 3

Excluded (n=9)  
Antibiotic use: 6  
Other diseases: 3

SCLC (n=8)

AC (n=14)

SCC (n=6)

Healthy controls (HC, n=19)

Lung cancer patients (LC, n=28)

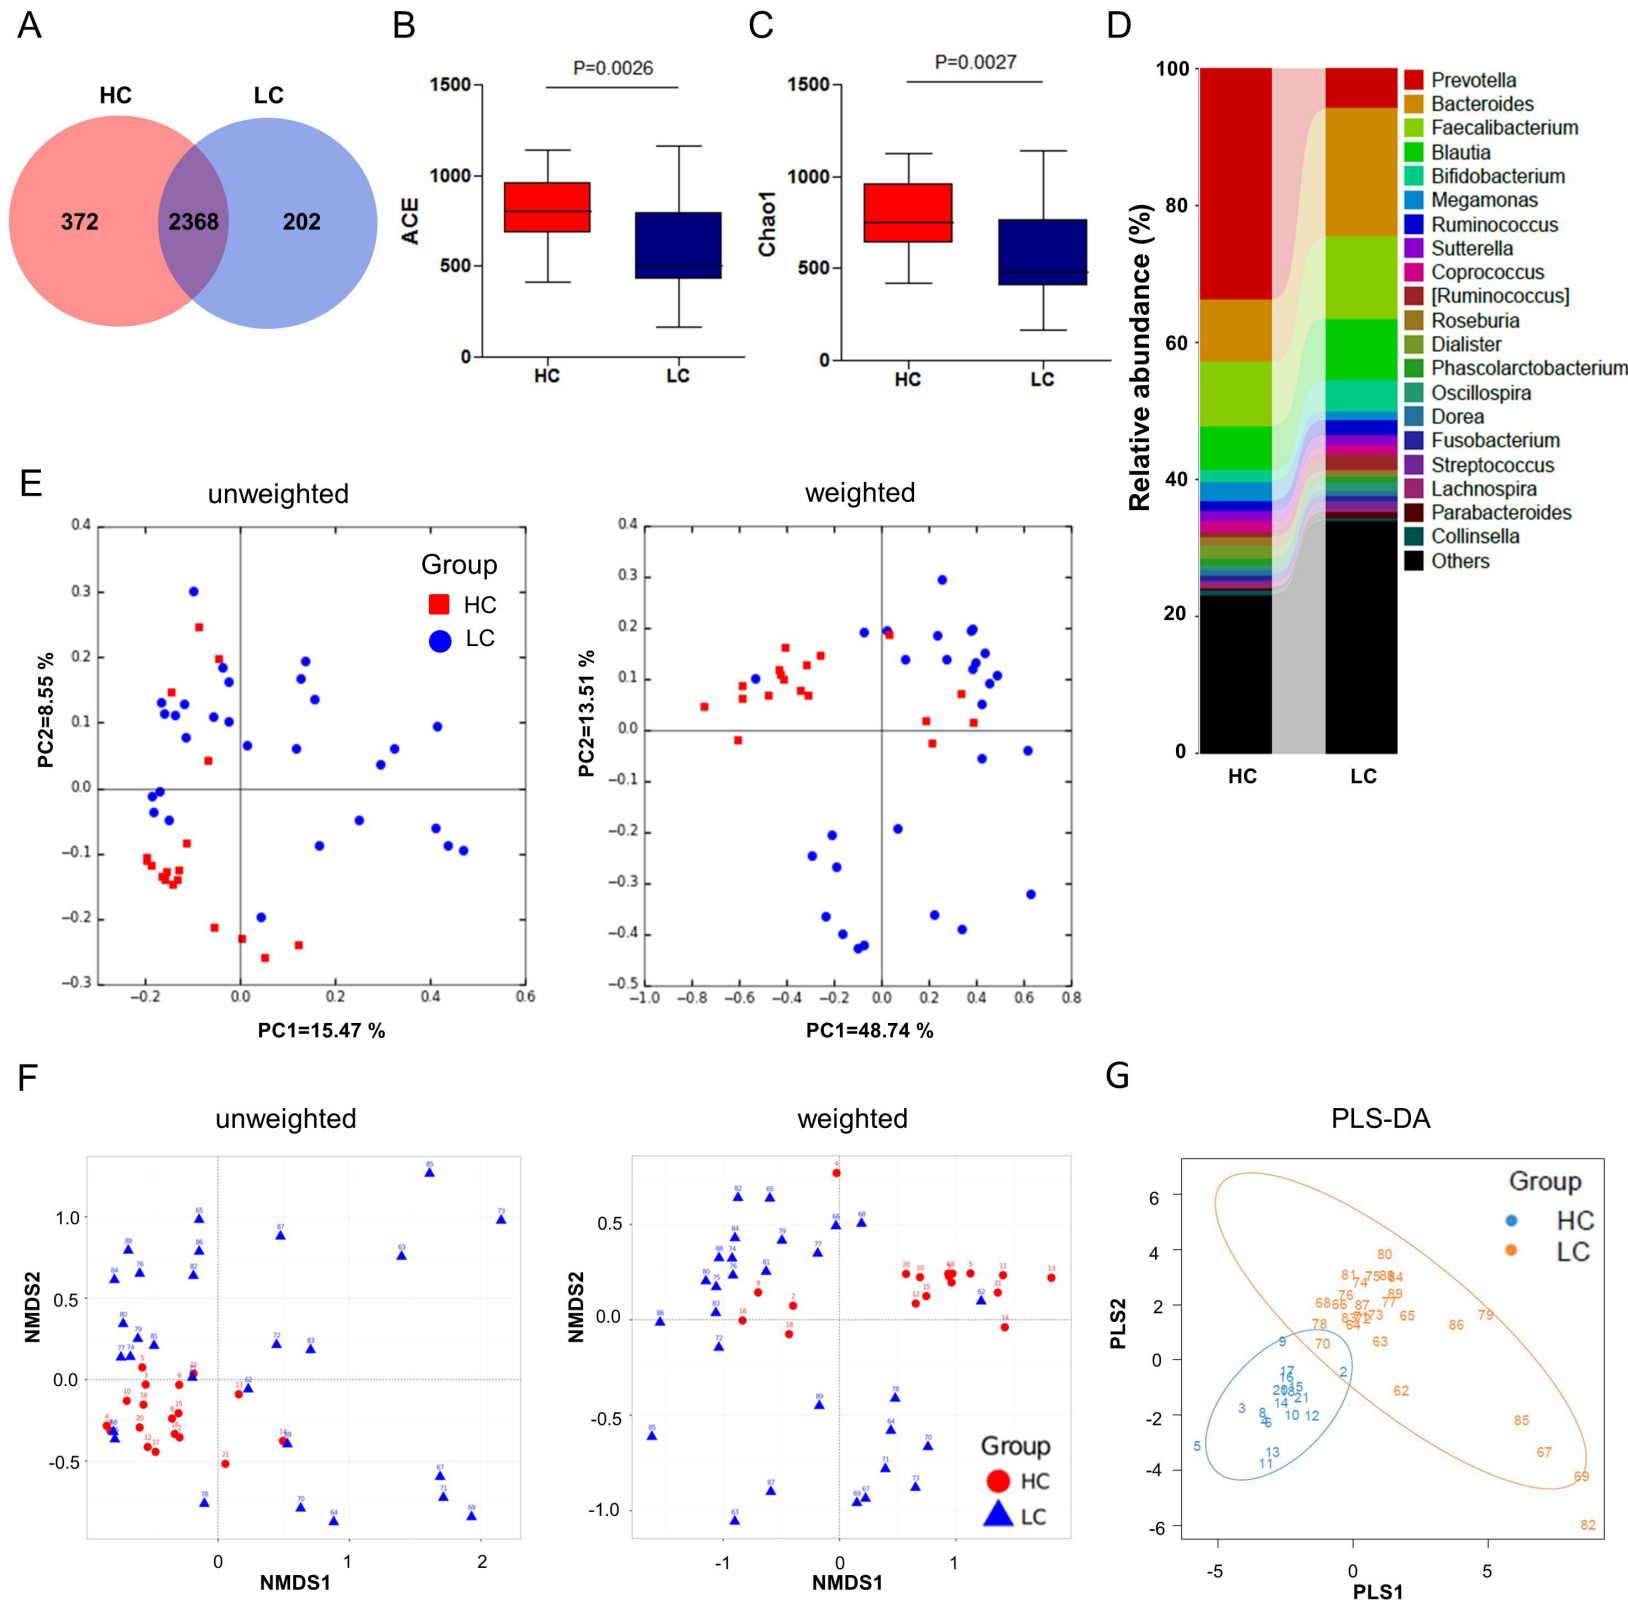

A

HC LC

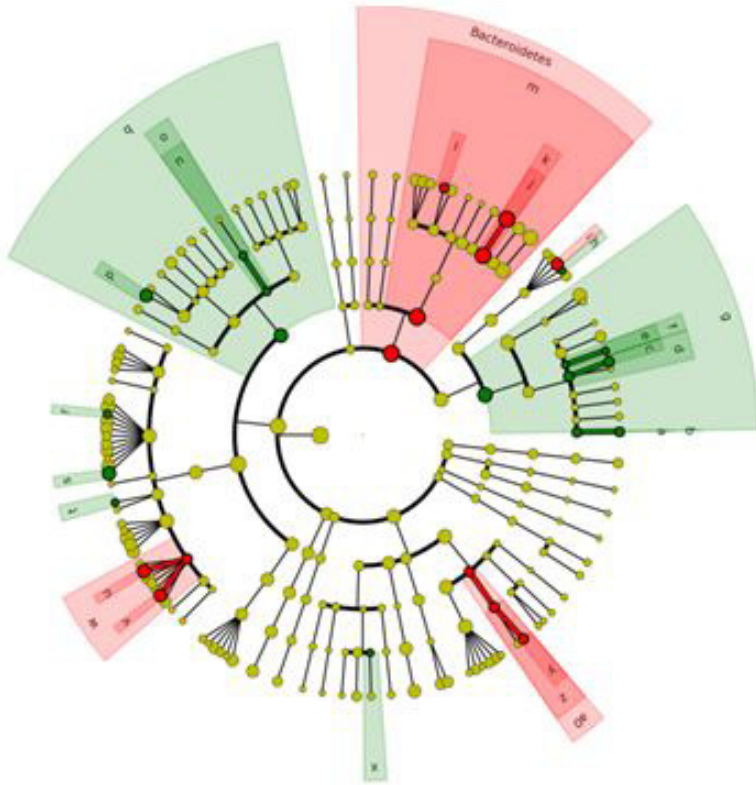

- a: Actinomyces
- b: Actinomycetaceae
- c: Rothia
- d: Micrococcaceae
- e: Mycobacterium
- f: Mycobacteriaceae
- g: Actinobacteria
- h: Atopobium
- i: Collinsella
- j: Prevotella
- k: Prevotellaceae
- l: Odoribacter
- m: Bacteroidia
- n: Gemellaceae
- o: Gemellales
- p: Streptococcus
- q: Bacilli
- r: Clostridium
- s: \_Ruminococcus\_
- t: Peptostreptococcus
- u: Dialister
- v: Phascolarctobacterium
- w: Veillonellaceae
- x: Methylobacteriaceae
- y: Haemophilus
- z: Pasteurellaceae
- a0: Pasteurellales

B

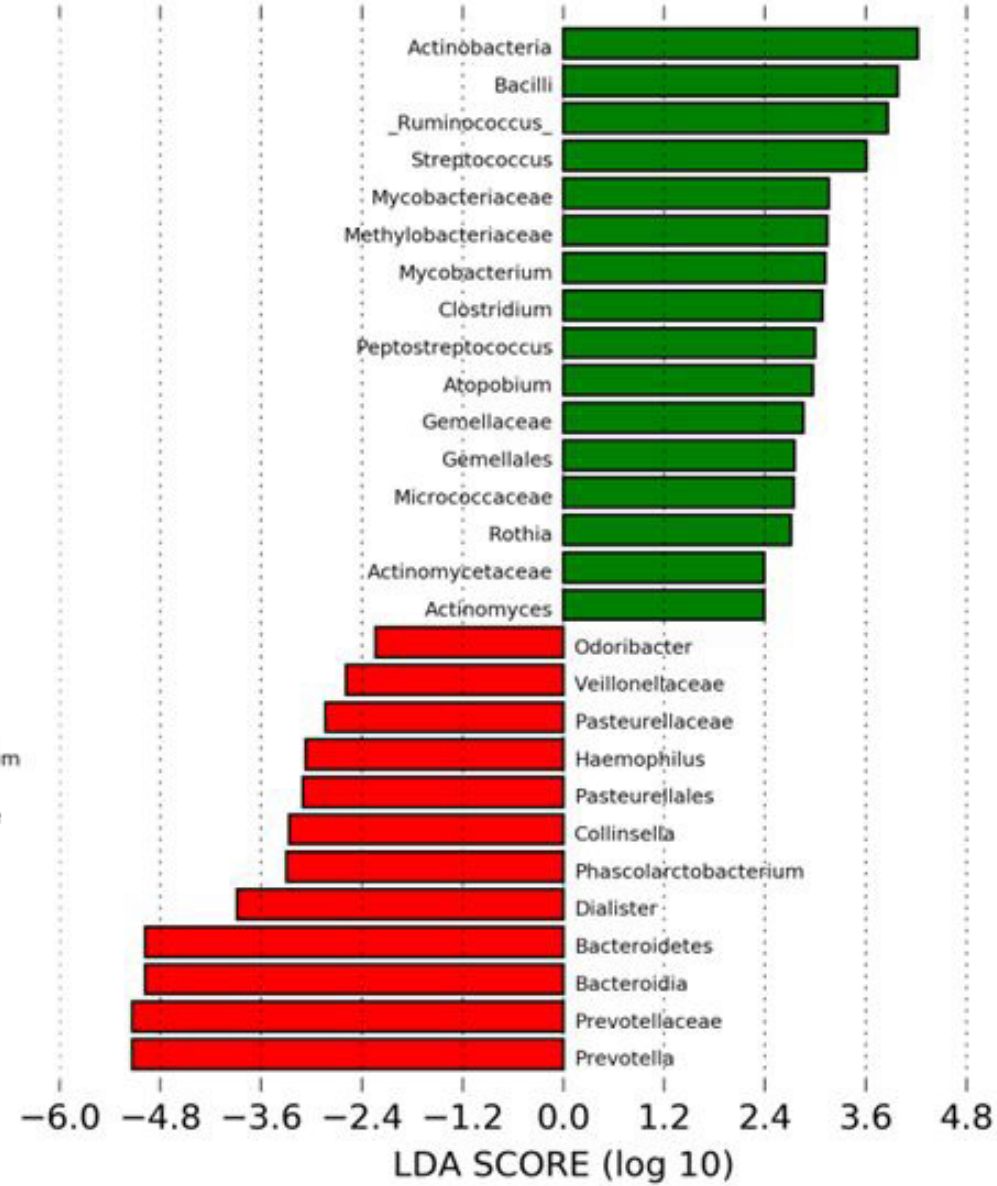



A

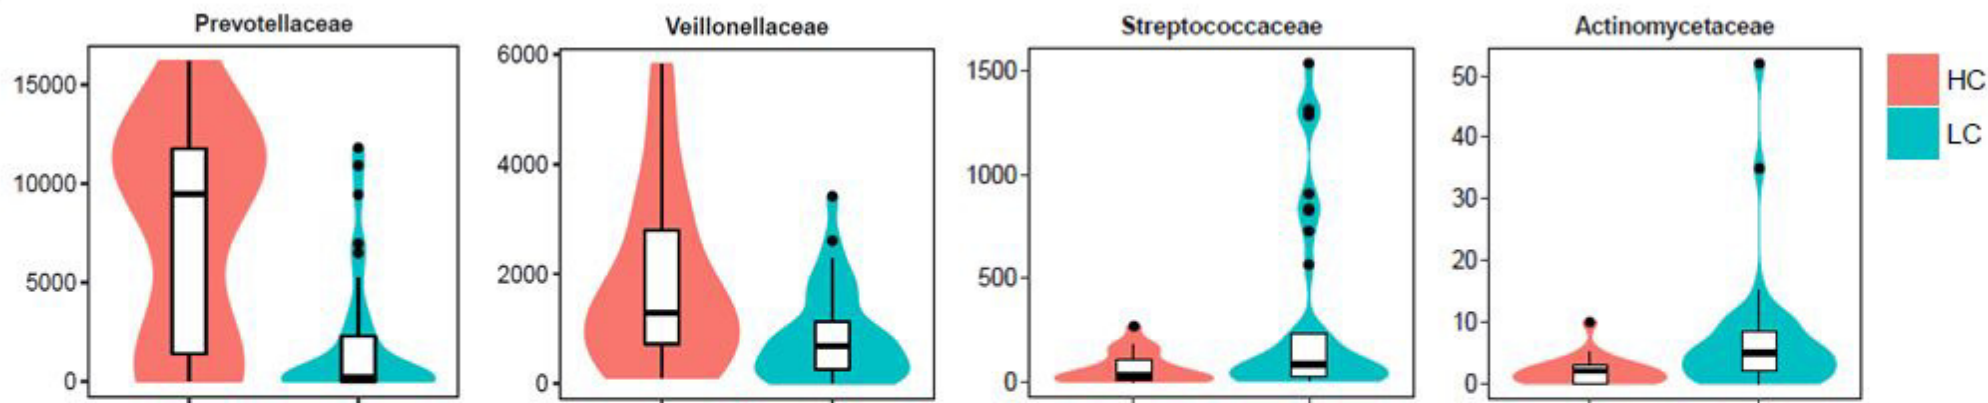

B

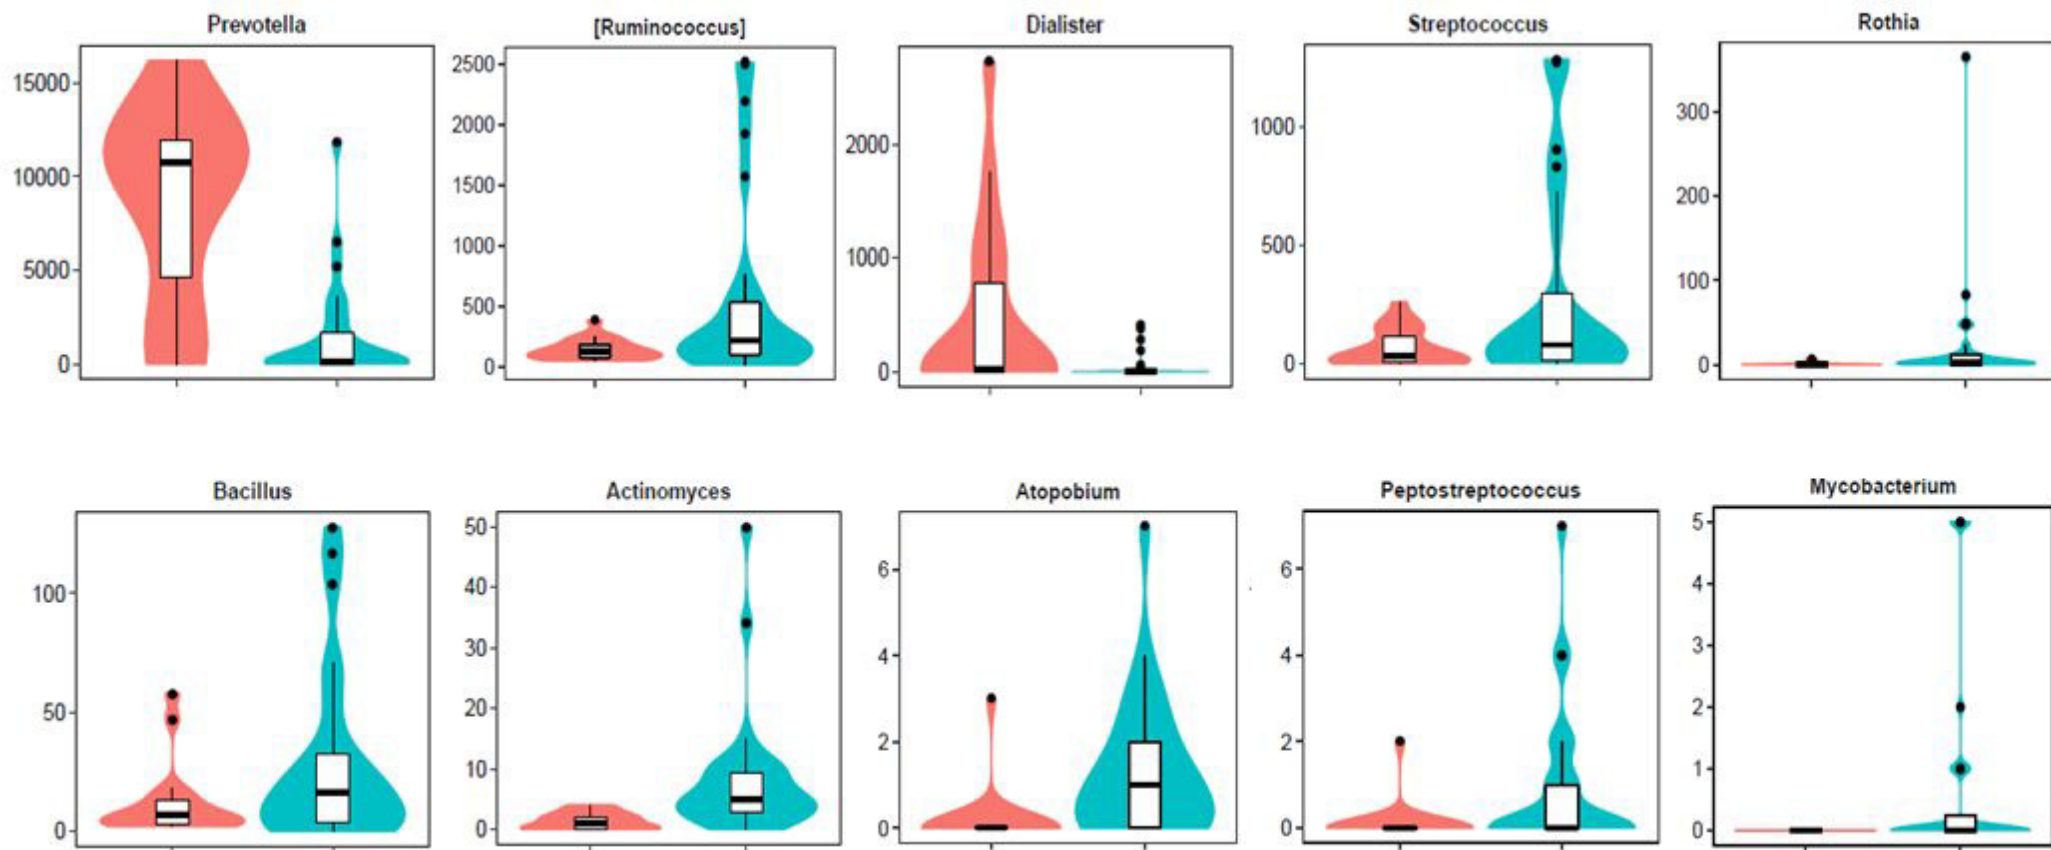



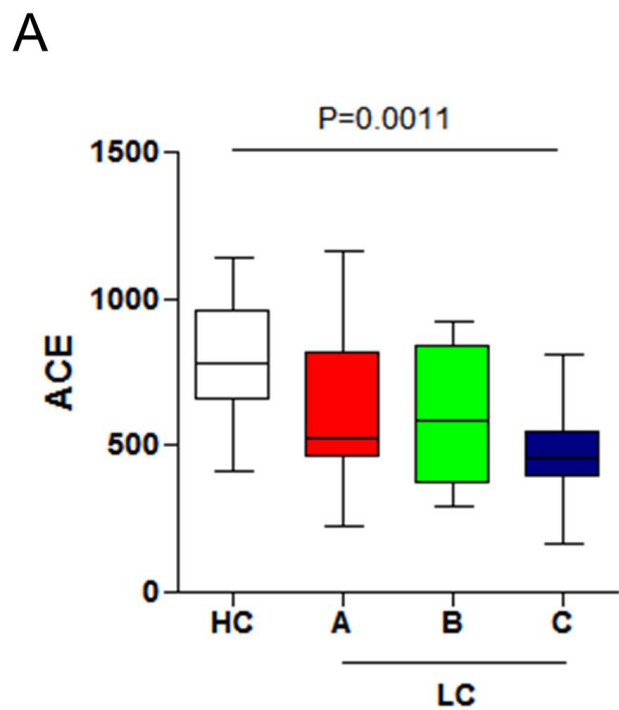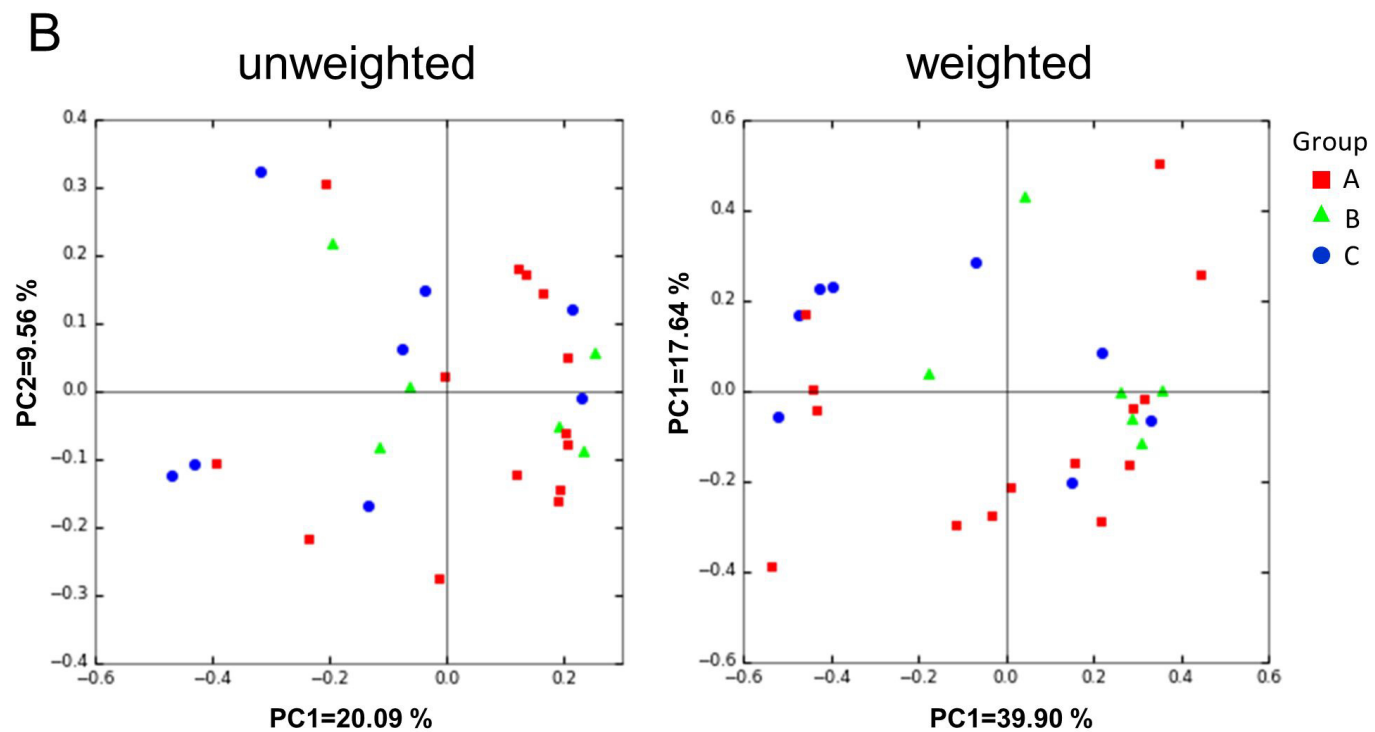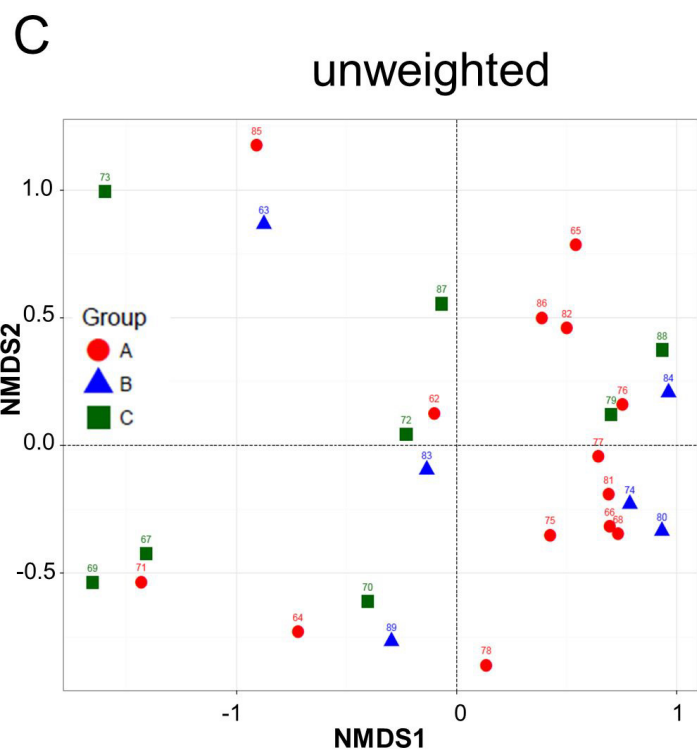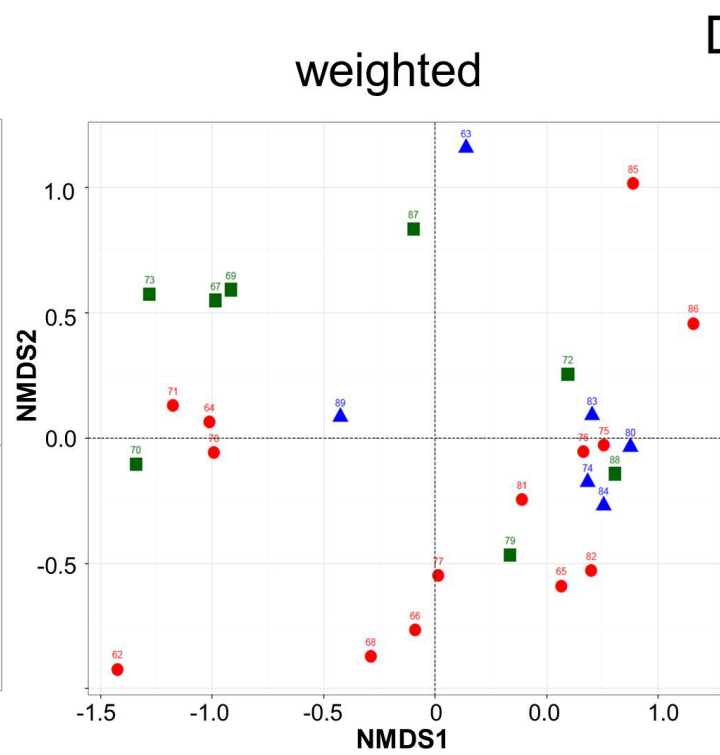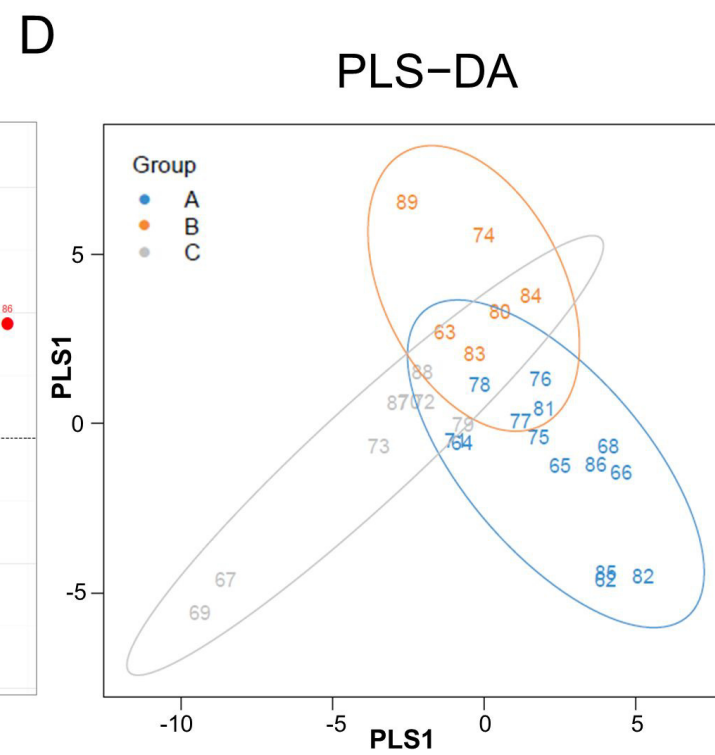

Source: https://www.biorxiv.org/content/10.1101/640359v1.full.pdf
